# Supplementary material for: Cre-assisted fine-mapping of neural circuits using orthogonal split inteins
Source: eLife journal article supplement (doi:10.7554/elife.53041), 2020-04-14

Figure 1—figure supplement 2

A

tcacTTTGCAcAACCAGgGTTGCCAGGCGGCGCAA<sup>ta</sup>CgTTTACgATCCC<sup>a</sup>CC<sup>caa</sup>AAcTCCCC<sup>aa</sup>ATCGgtccaTAG  
GTAGATCT<sup>ac</sup>GtCAGCTGTCAGCTGGCGCA<sup>t</sup>GgCCGCGGtCagTGGTTATTGACAACCTCCTtTgGtCgTAATCCTGCC  
AACATCGTAAAGTAATAAAATTTGCCTGAA<sup>a</sup>AaGgAAAA<sup>t</sup>cTGccGGgGATCG<sup>a</sup>CtATAAAA<sup>att</sup>GGCccAGcCAGGTA  
AGCTcCGTAATGATTGACCCCGA<sup>cc</sup>ctcagtc<sup>cc</sup>cagacc<sup>cc</sup>cagaccgatccaggtccgattccgatccattgcaagtc  
gcgattccggtcccgaa<sup>acc</sup>AAAGCAACCCCTTAAGACG<sup>ct</sup>tctg<sup>cc</sup>gatgagccg<sup>gc</sup>CAGGCAA<sup>a</sup>Agcgaaga<sup>att</sup>t  
gaaACTAA<sup>gg</sup>attt<sup>tc</sup>gcctt<sup>gc</sup>AAAGGGGTTGGGtTGtCACgGGGGTTGCGGCAGCTGCG<sup>cc</sup>gAACAAATTGCCAAGGA  
gtTCTCCTTAATGAATTGCAAA<sup>t</sup>CATTTCGccGGGCATTGATCAAGTTT<sup>TG</sup>tCCttgCCAAGGGTGA<sup>aat</sup>ctgtgcgact  
aatgtg<sup>cc</sup>atcagccagcc<sup>cc</sup>caaa<sup>agg</sup>ggaa<sup>cc</sup>gga<sup>cc</sup>acac<sup>aa</sup>acgga<sup>ac</sup>atctgtgcg<sup>aa</sup>gaattcgc<sup>cc</sup>ttgtgtc  
tgctagtctgt<sup>ta</sup>GTCTGtTACCTACCCCA<sup>AAAGC</sup>gAACTTGACgAGCTTAGTCGTCTGAGGCTGATAAATGCAG  
TGCcg<sup>caa</sup>agTACAC<sup>ct</sup>cgcg<sup>aa</sup>attt<sup>tg</sup>tgtatgagatgtatg<sup>aaa</sup>aatgt<sup>aaa</sup>aatagatag<sup>ca</sup>atccga<sup>act</sup>atgc  
tccatgctaatgtt<sup>ct</sup>tccagc<sup>cg</sup>ttaTTACtTGTT<sup>aca</sup>TTGTTTA<sup>ct</sup>TTTatAAcCA<sup>tc</sup>TTggccAACAGCTGTTT  
aGcacCAAATGcCAA<sup>caa</sup>AGAA<sup>a</sup>CAATTCACTTt<sup>tg</sup>ggccAAGGAT<sup>att</sup>CCCgatcTA<sup>t</sup>tgatgaACCTtATGtTA  
CatGCTCAATTAACG<sup>ac</sup>TcCATGGgTGTCACTGT<sup>TT</sup>TTTGGCA<sup>AAA</sup>taaGGACAATGT<sup>act</sup>GCTC<sup>a</sup>GATTTCCGCtG  
AA<sup>tac</sup>acaa<sup>ac</sup>ata<sup>ac</sup>ata<sup>ac</sup>ata<sup>ac</sup>ata<sup>ac</sup>tttgcctagGAAGTGCTGcG<sup>a</sup>TTTTGGTGCGTGGCAA<sup>ct</sup>tttgggtaccg<sup>aa</sup>acaa  
CAGCTGTC<sup>gc</sup>acattGATTT<sup>ct</sup>CCGAGTGCATTGTCCT<sup>gg</sup>ccg<sup>caa</sup>ac<sup>cg</sup>ggag<sup>ac</sup>TGTGTGTGTGTGTG<sup>cgt</sup>AGGAC  
TTTCACTCCGtg

B

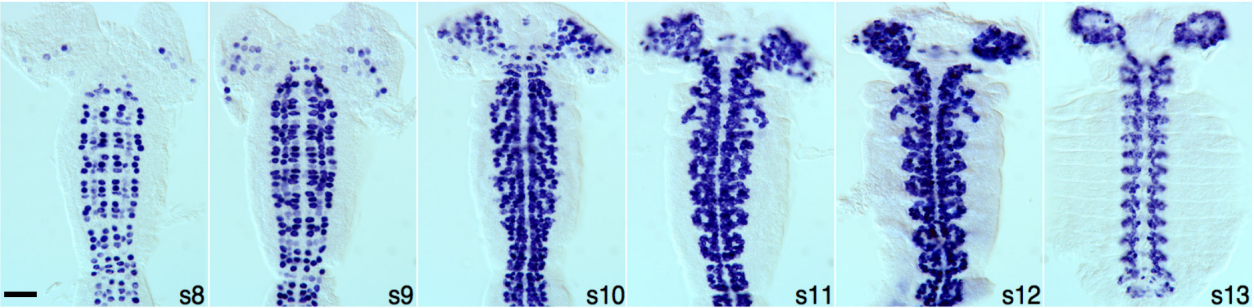

C

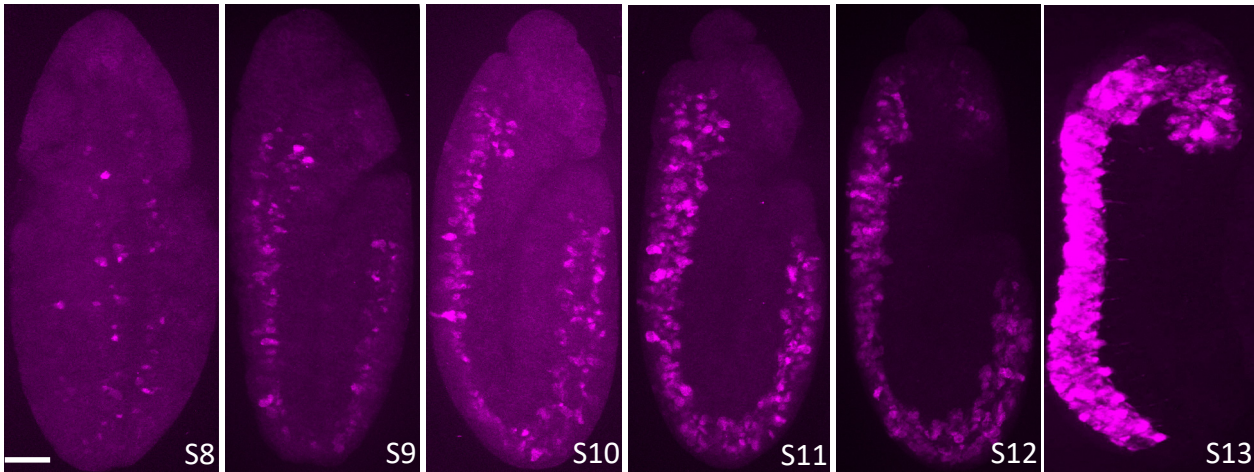

D

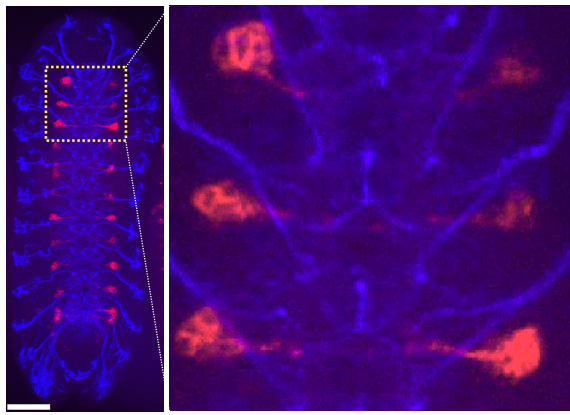

Supplement: supp [file elife_poa_e53041_Figure_1_figure_supplement_2.pdf › elife_poa_e53041_Figure_1_figure_supplement_2.pdf]
