# Supplementary material for: Cre-assisted fine-mapping of neural circuits using orthogonal split inteins
Source: eLife journal article supplement (doi:10.7554/elife.53041), 2020-04-14
Supplement: supp [file elife_poa_e53041_Figure_2I_source_data_1.xlsx]

## Sheet: Sheet1
Sample	R14E10∩R61D12	R44F09∩ R52B02	R14E10∩R26F12	R14E10∩R30A10	cas-8∩R56A12	R14E10∩R10C04	R14E10∩R75A01	R44F03∩R14F08	R44F03∩R52B02	R17A10∩R17A10	R44F09∩R57B09	R44F09∩R26F12	R14E10∩R14F08	R10G07∩R61D12
1	1	1	4	3	6	1	4	3	6	4	4	3	4	2
2	1	3	2	1	8	5	2	6	2	9	5	2	2	5
3	1	1	6	3	11	6	2	13	8	12	2	2	4	2
4	2	3	2	1	7	3	4	5	4	11	4	3	5	3
5	1	1	5	2	7	2	3	5	4	3	2	1	4	3
6		1		2	3	2	3	8	5	8	1	2	3	3
7		3		2	6	2	4	9	10	13	3	2	3	1
8					4	5	4	6	7	10	1	1	4	3
9					7	3	2	4	6	1	2	1	5	4
10					2	9	1	1	6	7	1		2	5
11					6	4	4	17	4	12	2		2	3
12					2	2	2	7	5	12	4		9	4
13					12	3	2	3	6	8	2		9	3
14					3	4			4		3			8
15					2	6			7					1
16					7	4								1
17					3									6
18														4
19														1
Average	1.2	1.85714	3.8	2	5.64706	3.8125	2.84615	6.69231	5.6	8.46154	2.57143	1.88889	4.30769	3.26316
StDev	0.447214	1.06904	1.78885	0.816497	3.01954	2.04022	1.06819	4.34712	1.95667	3.82133	1.28388	0.781736	2.32324	1.85119
