# Supplementary material for: Cre-assisted fine-mapping of neural circuits using orthogonal split inteins
Source: eLife. 2020 Apr 14;9:e53041. doi: 10.7554/eLife.53041 (PMC7217698; doi:10.7554/eLife.53041)
Supplement: Supplementary file 1. — The table lists all NBEs used in this study, their sources, and the names of the corresponding CreB and CreC constructs made with them. [file elife-53041-supp1.xlsx]

## Sheet: Sheet2
Enhancer	CreB	CreC	Source
stg14	HJP-251	HJP-205	Wang et al., Development 2014, 141:253-258
GMR69E01	HJP-230	HJP-231	This paper
GMR14D03	HJP-233	HJP-234	This paper
GMR45D10	HJP-236	HJP-237	This paper
GMR15D07	HJP-239	HJP-240	This paper
GMR86C05	HJP-244	HJP-245	This paper
GMR12E08	HJP-247	HJP-248	This paper
GMR16H11	HJP-346	HJP-255	Manning et al., Cell Rep. 2012, 2:1002-13
GMR14C05	HJP-536S	HJP-256	Manning et al., Cell Rep. 2012, 2:1002-13
GMR94H10	HJP-540S	HJP-257	This paper
GMR13B11*	HJP-542S	HJP-258	This paper
GMR12F05*	HJP-543S	HJP-259	This paper
GMR44F09	HJP-357	HJP-260	This paper
GMR43C05	HJP-550S	HJP-261	This paper
GMR19H10	HJP-551S	HJP-262	This paper
GMR19C09*	HJP-552S	HJP-263	This paper
GMR86C05	HJP-553S	HJP-264	This paper
GMR9E05	HJP-554S	HJP-265	Manning et al., Cell Rep. 2012, 2:1002-13
GMR17A10	HJP-348	HJP-266	This paper
GMR14G10	HJP-555S	HJP-267	This paper
GMR1A02	HJP-556S	HJP-268	This paper
GMR42D01	HJP-557S	HJP-269	This paper
GMR10C12	HJP-558S	HJP-270	Manning et al., Cell Rep. 2012, 2:1002-13
GMR11A01	HJP-559S	HJP-271	This paper
GMR24E03*	HJP-560S	HJP-272	This paper
GMR28F04	HJP-561S	HJP-274	This paper
GMR43H02	HJP-562S	HJP-276	This paper
tll-15	HJP-309	HJP-300	This paper
otd	HJP-308	HJP-305	Asahina et al., 2014; Gao and Finkelstein, 1998
cas5	HJP-561A	HJP-307	This paper
GMR13C01	HJP-562A	HJP-321	This paper
GMR44F03	HJP-204	HJP-322	This paper
GMR60F07	HJP-563A	HJP-323	Manning et al., Cell Rep. 2012, 2:1002-13
GMR65C05	HJP-511	HJP-324	Manning et al., Cell Rep. 2012, 2:1002-13
GMR18G07*	HJP_563S	HJP-328	Manning et al., Cell Rep. 2012, 2:1002-13
GMR14E10	HJP-443m	HJP-329	Manning et al., Cell Rep. 2012, 2:1002-13
GMR10D04	HJP-564A	HJP-333	Manning et al., Cell Rep. 2012, 2:1002-13
GMR10C04	HJP-454m	HJP-334	Manning et al., Cell Rep. 2012, 2:1002-13
GMR10G07*	HJP-444m	HJP-335	Manning et al., Cell Rep. 2012, 2:1002-13
GMR10G06	HJP-565A	HJP-336	Manning et al., Cell Rep. 2012, 2:1002-13
GMR11E06	HJP-476	HJP-337	Manning et al., Cell Rep. 2012, 2:1002-13
GMR60D04*	HJP-477	HJP-338	Manning et al., Cell Rep. 2012, 2:1002-13
GMR35B04*	HJP-478	HJP-339	Manning et al., Cell Rep. 2012, 2:1002-13
GMR12B03	HJP-479	HJP-340	Manning et al., Cell Rep. 2012, 2:1002-13
GMR13E07*	HJP-480	HJP-341	Manning et al., Cell Rep. 2012, 2:1002-13
GMR31B05	HJP-481	HJP-342	Manning et al., Cell Rep. 2012, 2:1002-13
GMR64C10	HJP-482	HJP-343	Manning et al., Cell Rep. 2012, 2:1002-13
GMR46A08	HJP-483	HJP-344	Manning et al., Cell Rep. 2012, 2:1002-13
GMR60F11	HJP-484	HJP-345	Manning et al., Cell Rep. 2012, 2:1002-13
GMR51F09	HJP-485	HJP-351	Manning et al., Cell Rep. 2012, 2:1002-13
GMR39A02	HJP-486	HJP-352	Manning et al., Cell Rep. 2012, 2:1002-13
GMR13D10	HJP-487	HJP-353	Manning et al., Cell Rep. 2012, 2:1002-13
GMR13H11	HJP-489	HJP-355	Manning et al., Cell Rep. 2012, 2:1002-13
GMR32G04	HJP-490	HJP-356	Manning et al., Cell Rep. 2012, 2:1002-13
GMR38H11	HJP-491	HJP-358	Manning et al., Cell Rep. 2012, 2:1002-13
GMR13H03	HJP-492	HJP-359	Manning et al., Cell Rep. 2012, 2:1002-13
GMR56A10	HJP-493	HJP-360	Manning et al., Cell Rep. 2012, 2:1002-13
GMR61B05	HJP-495	HJP-362	Manning et al., Cell Rep. 2012, 2:1002-13
GMR13H01	HJP-496	HJP-363	Manning et al., Cell Rep. 2012, 2:1002-13
GMR61D03	HJP-533S	HJP-364	Manning et al., Cell Rep. 2012, 2:1002-13
GMR21F08	HJP-497	HJP-365	Manning et al., Cell Rep. 2012, 2:1002-13
GMR56A12	HJP-498	HJP-366	Manning et al., Cell Rep. 2012, 2:1002-13
GMR15H01	HJP-499	HJP-367	Manning et al., Cell Rep. 2012, 2:1002-13
GMR23E06	HJP-500	HJP-368	Manning et al., Cell Rep. 2012, 2:1002-13
GMR75H01*	HJP-501	HJP-369	Manning et al., Cell Rep. 2012, 2:1002-13
GMR19F01*	HJP-502	HJP-370	Manning et al., Cell Rep. 2012, 2:1002-13
GMR57B09*	HJP-455m	HJP-371	Manning et al., Cell Rep. 2012, 2:1002-13
GMR75A01	HJP-456m	HJP-372	Manning et al., Cell Rep. 2012, 2:1002-13
GMR61D12*	HJP-457m	HJP-373	Manning et al., Cell Rep. 2012, 2:1002-13
GMR61D10	HJP-534s	HJP-374	Manning et al., Cell Rep. 2012, 2:1002-13
GMR17G07	HJP-503	HJP-375	Manning et al., Cell Rep. 2012, 2:1002-13
GMR23E04	HJP-458m	HJP-376	Manning et al., Cell Rep. 2012, 2:1002-13
GMR29A12*	HJP-504	HJP-377	Manning et al., Cell Rep. 2012, 2:1002-13
GMR43B11*	HJP-505	HJP-378	Manning et al., Cell Rep. 2012, 2:1002-13
GMR32G02	HJP-459m	HJP-379	This paper
GMR61E02	HJP-460m	HJP-380	Manning et al., Cell Rep. 2012, 2:1002-13
GMR32G03	HJP-506	HJP-383	Manning et al., Cell Rep. 2012, 2:1002-13
GMR47A07	HJP-507	HJP-384	Manning et al., Cell Rep. 2012, 2:1002-13
GMR18F04	HJP-508	HJP-385	Manning et al., Cell Rep. 2012, 2:1002-13
GMR18H03	HJP-509	HJP-386	Manning et al., Cell Rep. 2012, 2:1002-13
GMR37E10	HJP-510	HJP-387	Manning et al., Cell Rep. 2012, 2:1002-13
GMR38A11	HJP-568A	HJP-388	Manning et al., Cell Rep. 2012, 2:1002-13
GMR39C11*	HJP-453m	HJP-389	Manning et al., Cell Rep. 2012, 2:1002-13
GMR88A06*	HJP-513	HJP-391	This paper
GMRR9A11	HJP-461m	HJP-392	This paper
GMR21A10*	HJP-514	HJP-393	This paper
GMR54C11*	HJP-515	HJP-394	This paper
GMR56E07	HJP-466m	HJP-395	Manning et al., Cell Rep. 2012, 2:1002-13
GMR70F01	HJP-517	HJP-396	Manning et al., Cell Rep. 2012, 2:1002-13
GMR9D10*	HJP-518	HJP-397	This paper
GMR13D02	HJP-519	HJP-398	Manning et al., Cell Rep. 2012, 2:1002-13
danr-1	HJP-566A	HJP-399	This paper
pdm2-37a	HJP-567A	HJP-400	BMC Genomics. 2015; 16(1): 700.
svp-29	HJP-462m	HJP-401	This paper
GMR69E07	HJP-451m	HJP-402	Manning et al., Cell Rep. 2012, 2:1002-13
GMR53D12	HJP-521	HJP-403	Manning et al., Cell Rep. 2012, 2:1002-13
GMR27A10	HJP-522	HJP-404	Manning et al., Cell Rep. 2012, 2:1002-13
GMR40A01	HJP-523	HJP-405	Manning et al., Cell Rep. 2012, 2:1002-13
GMR76C05	HJP-524	HJP-406	Manning et al., Cell Rep. 2012, 2:1002-13
GMR69E06	HJP-525a	HJP-407	Manning et al., Cell Rep. 2012, 2:1002-13
GMR30C12	HJP-526a	HJP-440	Manning et al., Cell Rep. 2012, 2:1002-13
GMR31C02	HJP-527a	HJP-408	Manning et al., Cell Rep. 2012, 2:1002-13
GMR12H03	HJP-528a	HJP-409	Manning et al., Cell Rep. 2012, 2:1002-13
GMR17B02	HJP-529a	HJP-410	Manning et al., Cell Rep. 2012, 2:1002-13
GMR59D04	HJP-530a	HJP-411	Manning et al., Cell Rep. 2012, 2:1002-13
GMR26B12	HJP-531a	HJP-412	Manning et al., Cell Rep. 2012, 2:1002-13
GMR17C11*	HJP-467m	HJP-413	Manning et al., Cell Rep. 2012, 2:1002-13
GMR14F08	HJP-452m	HJP-414	Manning et al., Cell Rep. 2012, 2:1002-13
GMR26F12	HJP-463m	HJP-415	Manning et al., Cell Rep. 2012, 2:1002-13
GMR13H04	HJP-535a	HJP-416	Manning et al., Cell Rep. 2012, 2:1002-13
cas8	HJP-468m	HJP-417	This paper
CG7229-5	HJP-537a	HJP-418	This paper
GMR29B06	HJP-538a	HJP-419	This paper
GMR9A08	HJP-539a	HJP-420	This paper
GMR25G06	HJP-469m	HJP-421	This paper
GMR29B05	HJP-541a	HJP-422	Manning et al., Cell Rep. 2012, 2:1002-13
GMR52B02*	HJP-470m	HJP-423	Manning et al., Cell Rep. 2012, 2:1002-13
GMR30A10	HJP-471m	HJP-424	Manning et al., Cell Rep. 2012, 2:1002-13
GMR33C09	HJP-544a	HJP-425	Manning et al., Cell Rep. 2012, 2:1002-13
GMR38C12	HJP-545a	HJP-426	Manning et al., Cell Rep. 2012, 2:1002-13
GMR51G05	HJP-546a	HJP-427	Manning et al., Cell Rep. 2012, 2:1002-13
GMR73B05	HJP-547a	HJP-428	Manning et al., Cell Rep. 2012, 2:1002-13
GMR24C10	HJP-548a	HJP-429	Manning et al., Cell Rep. 2012, 2:1002-13
GMR33E11	HJP-549a	HJP-430	Manning et al., Cell Rep. 2012, 2:1002-13
GMR47G10	HJP-564S	HJP-431	Manning et al., Cell Rep. 2012, 2:1002-13
GMR24A05*	HJP-565S	HJP-432	This paper
GMR58G11	HJP-568S	HJP-433	This paper
GMR74G10*	HJP-569S	HJP-434	Manning et al., Cell Rep. 2012, 2:1002-13
GMR49A02	HJP-570S	HJP-435	This paper
GMR72A03	HJP-571S	HJP-436	This paper
GMR38B11	HJP-557a	HJP-438	Manning et al., Cell Rep. 2012, 2:1002-13
GMR72G07	HJP-558a	HJP-439	Manning et al., Cell Rep. 2012, 2:1002-13
GMR15D05	HJP-559a	HJP-441	Manning et al., Cell Rep. 2012, 2:1002-13
GMR47D08	HJP-560a	HJP-442	Manning et al., Cell Rep. 2012, 2:1002-13
*NBEs that produce overt differences in expression when driving CreB and CreC. Users who identify an NBE-CreC line with one of these enhancers in a Step 1 screen may want to continue using this line in the subsequent Step 2 screen (if possible) to preserve its expression pattern.
