# Supplementary material for: Cre-assisted fine-mapping of neural circuits using orthogonal split inteins
Source: eLife. 2020 Apr 14;9:e53041. doi: 10.7554/eLife.53041 (PMC7217698; doi:10.7554/eLife.53041)
Supplement: Supplementary file 3. — The table lists the primer and gBlock sequences used to generate constructs described in this paper. [file elife-53041-supp3.xlsx]

## Sheet: Sheet1
Primer25	CCGAGCTCGCCCGGGGATCGAGCGCAGCGGTATAAAAGGGCGCGGGGTGGCTGAGAGCATCAGTTGTGAATGAATGTTCGAGCCGAGCAGACGTGCCGCTGCCTTCGTTAATATCCTTTGAATAAGCCAACTTTGAATCACAAGACGCATACCAAACGGTAC	Integrated DNA Technologies, Inc.San Diego, CA
Primer26	CGTTTGGTATGCGTCTTGTGATTCAAAGTTGGCTTATTCAAAGGATATTAACGAAGGCAGCGGCACGTCTGCTCGGCTCGAACATTCATTCACAACTGATGCTCTCAGCCACCCCGCGCCCTTTTATACCGCTGCGCTCGATCCCCGGGCGAGCTCGGCCGG	Integrated DNA Technologies, Inc.San Diego, CA
gBlock007	AGTCAGGCTAGCAACTTAAAAAAAAAAATCAAAATGGAGGCCAAGACCTACATCGGCAAGCTGAAGAGCCGCAAGATCGTGAGCAACGAGGATACCTACGATATCCAGACCAGCACCCACAACTTCTTCGCCAACGATATCCTGGTGCACAACTCGGCAACAAGTCAGTTGAGTACGCGCGCGTTGGAGGGAATCTTCGAGGCCACTCACCGATTGATTTACGGTGCAAAAGATGACTCCGGCCAACGTTACTTGGCCTGGTCCGGTCACAGCGCACGTGTGGGTGCCGCCCGTGACATGGCGAGGGCCGGTGTTTCCATCCCAGAAATCATGCAAGCGGGCGGATGGACCAACGTGAATATTGTAATGAACTACATTCGTAATCTGGATAGTGAAACA…	Integrated DNA Technologies, Inc.San Diego, CA
gBlock008	AGTCAGGCTAGCAACTTAAAAAAAAAAATCAAAATGAGTAACTTGCTCACGGTACACCAAAATTTGCCGGCCCTGCCTGTGGACGCCACGTCCGACGAGGTCCGAAAGAATCTGATGGACATGTTCCGTGACAGGCAGGCCTTTAGCGAGCACACCTGGAAGATGCTGCTCTCGGTGTGCAGGTCCTGGGCCGCTTGGTGCAAGCTGAACAACCGAAAGTGGTTTCCCGCGGAGCCCGAGGACGTCCGCGATTATCTGCTGTACCTGCAGGCTCGCGGACTGGCCGTCAAAACAATACAGCAACATTTGGGTCAGCTGAACATGCTCCACAGGCGCAGCGGACTGCCCCGGCCATCCGATAGCAATGCAGTGAGCCTGGTAATGCGTCGAATACGCAAG…	Integrated DNA Technologies, Inc.San Diego, CA
gBlock009	AGTCAGGGTCTCCTGGTCAGCACTGCTGGCGTGGAGAAAGCACTTTCCCTGGGTGTGACGAAATTGGTCGAGCGATGGATCAGTGTGAGTGGCGTCGCCGATGACCCCAACAATTATCTGTTCTGCAGGGTGCGCAAAAATGGAGTGGCAGCCCCCTGCCTGGTGGGCAGCAGCGAGATCATCACCCGCAACTACGGCAAGACCACCATCAAGGAGGTGGTGGAGATCTTCGATAACGATAAGAACATCCAGGTGCTGGCCTTCAACACCCACACCGATAACATCGAGTGGGCCCCCATCAAGGCCGCCCAGCTGACCCGCCCCAACGCCGAGCTGGTGGAGCTGGAGATCGATACCCTGCACGGCGTGAAGACCATCCGCTGCACCCCCGATCACCCC…	Integrated DNA Technologies, Inc.San Diego, CA
gBlock010	AGTCAGGCTAGCAACTTAAAAAAAAAAATCAAAATGATGCTGAAGAAGATCCTGAAGATCGAGGAGCTGGATGAGCGCGAGCTGATCGATATCGAGGTGAGCGGCAACCACCTGTTCTACGCCAACGATATCCTGACCCACAACAGCAATGCAGTGAGCCTGGTAATGCGTCGAATACGCAAGGAAAACGTGGACGCCGGCGAGAGGGCCAAACAGGCGTTGGCTTTCGAACGCACCGATTTCGATCAGGTGCGGTCGTTGATGGAGAACAGCGATCGATGCCAGGACATCCGGAACTTGGCGTTTTTGGGCATTGCCTATAACACCCTCCTTCGCATCGCCGAGATAGCGCGTATCCGAGTTAAAGACATTTCCCGTACAGACGGAGGCCGCATGCCT…	Integrated DNA Technologies, Inc.San Diego, CA
gBlock011	AGTCAGGCATGCTTATTCACATCGGACGCACGAAAACCCTGGTCAGCACTGCTGGCGTGGAGAAAGCACTTTCCCTGGGTGTGACGAAATTGGTCGAGCGATGGATCAGTGTGAGTGGCGTCGCCGATGACCCCAACAATTATCTGTTCTGCAGGGTGCGCAAAAATGGAGTGGCAGCCCCCTCGGCAACAAGTCAGTTGAGTACGCGCGCGTTGGAGGGAATCTTCGAGGCCACTCACCGATTGATTTACGGTGCAAAAGATGACTCCGGCCAACGTTACTTGGCCTGGTCCGGTCACAGCGCACGTGTGGGTGCCGCCCGTGACATGGCGAGGGCCGGTGTTTCCATCCCAGAAATCATGCAAGCGGGCGGATGGACCAACGTGAATATTGTAATGA…	Integrated DNA Technologies, Inc.San Diego, CA
gBlock012	AGTCAGGCTAGCAACTTAAAAAAAAAAATCAAAATGAGTAACTTGCTCACGGTACACCAAAATTTGCCGGCCCTGCCTGTGGACGCCACGTCCGACGAGGTCCGAAAGAATCTGATGGACATGTTCCGTGACAGGCAGGCCTTTAGCGAGCACACCTGGAAGATGCTGCTCTCGGTGTGCAGGTCCTGGGCCGCTTGGTGCAAGCTGAACAACCGAAAGTGGTTTCCCGCGGAGCCCGAGGACGTCCGCGATTATCTGCTGTACCTGCAGGCTCGCGGACTGGCCGTCAAAACAATACAGCAACATTTGGGTCAGCTGAACATGCTCCACAGGCGCAGCGGACTGCCCCGGCCATCCGATTGCCTGGATCTGAAGACCCAGGTGCAGACCCCCCAGGGC…	Integrated DNA Technologies, Inc.San Diego, CA
gBlock015	AGTCAGGCATGCTTATTCACATCGGACGCACGAAAACCCTGGTCAGCACTGCTGGCGTGGAGAAAGCACTTTCCCTGGGTGTGACGAAATTGGTCGAGCGATGGATCAGTGTGAGTGGCGTCGCCGATGACCCCAACAATTATCTGTTCTGCAGGGTGCGCAAAAATGGAGTGGCAGCCCCCTGCCTGGTGGGCAGCAGCGAGATCATCACCCGCAACTACGGCAAGACCACCATCAAGGAGGTGGTGGAGATCTTCGATAACGATAAGAACATCCAGGTGCTGGCCTTCAACACCCACACCGATAACATCGAGTGGGCCCCCATCAAGGCCGCCCAGCTGACCCGCCCCAACGCCGAGCTGGTGGAGCTGGAGATCGATACCCTGCACGGCGTGAAGA…	Integrated DNA Technologies, Inc.San Diego, CA
gBlock013-NgoMIV+AatII	AGTCAGGCCGGCATAACTTCGTATAATGTATGCTATACGAAGTTATCCTGCAGGAACTTAAAAAAAAAAATCAAAATGGATTACAACAAAAGGAGTAGTGTGAGTACGGTGCCGAATGCTGCTCCCATTCGCGTGGGCTTCGTGGGATTGAACGCGGCTAAGGGTTGGGCCATTAAAACGCATTATCCAGCCATACTGCAGCTGAGCTCCCAGTTCCAAATAACAGCGCTTTATTCCCCCAAGATCGAGACGTCCTGACT	Integrated DNA Technologies, Inc.San Diego, CA
gBlock014-MfeI-KpnI	AGTCAGCAATTGTTGTTGTTAACTTGTTTATTGCAGCTTATAATGGTTACAAATAAAGCAATAGCATCACAAATTTCACAAATAAAGCATTTTTTTCACTGCATTCTAGTTGTGGTTTGTCCAAACTCATCAATGTATCTTATCATGTCTGGATCCCTAGGATAACTTCGTATAATGTATGCTATACGAAGTTATGGTACCCTGACT	Integrated DNA Technologies, Inc.San Diego, CA
NgoMIV-loxP-hsp70 terminator-MluI	GTGATAAACGGCCGGCATAACTTCGTATAATGTATGCTATACGAAGTTATGTCGACTAAAGCCAAATAGAAAATTATTCAGTTCCTGGCTTAAGTTTTTAAAAGTGATATTATTTATTTGGTTGTAACCAACCAAAAGAATGTAAATAACTAATACATAATTATGTTAGTTTTAAGTTAGCAACAAATTGATTTTAGCTATATTAGCTACTTGGTTAATAAATAGAATATATTTATTTAAAGATAATTGCGTTTTTATTGTCAGGGAGTGAGTTTGCTTAAAAACTCGTTTAGGTTTGTCCTCCCGAAATTATTTATTTAAATGCGATGGAGAGTTGGCGCCGAATCGAAAACTTTACGCGCTTAAAAGCACGAGTTGGCATCCCTAACGCGTAGGGAT…	Integrated DNA Technologies, Inc.San Diego, CA
gBlock043	TCTGCTGTACCTGCAGGCTCGCGGACTGGCCGTCAAAACAATACAGCAACATTTGGGTCAGCTGAACATGCTCCACAGGCGCAGCGGACTGCCCCGGCCATCCGATAGCAATGCAGTGAGCCTGGTAATGCGTCGAATACGCAAGGAAAACGTGGACGCCGGCGAGAGGGCCAAACAGGCGTTGGCTTTCGAACGCACCGATTTCGATCAGGTGCGGTCGTTGATGGAGAACAGCGATCGATGCCAGGACATCCGGAACTTGGCGTTTTTGGGCATTGCCTATAACACCCTCCTTCGCATCGCCGAGATAGCGCGTATCCGAGTTAAAGACATTTCCCGTACAGACGGAGGCCGCATGCTTATTCACATCGGACGCACGAAAACCCTGGTCAGCACTGC…	Integrated DNA Technologies, Inc.San Diego, CA
gBlock025	CTATACGAAGTTATGGTACCGCTAGTTGGCCACGGGTGCGCATGATCGTGCTCCTGTCGTTGAGGACCCGGCTAGGCTGGCGGGGTTGCCTTACTGGTTAGCAGAATGAATCACCGATACGCGAGCGAACGTGAAGCGACTGCTGCTGCAAAACGTCTGCGACCTGAGCAACAACATGAATGGTCTTCGGTTTCCGTGTTTCGTAAAGTCTGGAAACGCGGAAGTCAGCGCCCTGCACCATTATGTTCCGGACTAGTTCCAGTGAAATCCAAGCATTTTCTAAATTAAATGTATTCTTATTATTATAGTTGTTATTTTTGATATATATAAACAACACTATTATGCCCACCATTTTTTTGAGATGCATCTACACAAGGAACA	Integrated DNA Technologies, Inc.San Diego, CA
Primer58	GACAAGCCGAACATA accggt GATCCAGACATGATAAGATACATTGATGAG	Integrated DNA Technologies, Inc.San Diego, CA
Primer59	CTAGGCGCGCCCATA AGCTTGCATGCCTGCAGGTC	Integrated DNA Technologies, Inc.San Diego, CA
Primer71	ACGAAGTTATGGTACCAAAAGGTAGGTTCAACCACTGATGCCTAGGCACACCGAAACGACTAACCCTAATTCTTATCCTTTACTTCAGGAGGCCTACCGGTGCTAGAACTTAAAAAAAAAAATCAAAATGGGCAACAAATGCTGCAGCAAG	Integrated DNA Technologies, Inc.San Diego, CA
Primer72	AAACGATTCATGTTTTTACTTGTAAAGCTCGTCCATACCG	Integrated DNA Technologies, Inc.San Diego, CA
Primer73	AAACATGAATCGTTTTTAAAATAACAAATCAATTGTTTTATAATATTCG	Integrated DNA Technologies, Inc.San Diego, CA
Primer74	CAGCGGCCGCTCTAGAGTTAACTCGAATCGCTATCCAAGC	Integrated DNA Technologies, Inc.San Diego, CA
Primer75	CTATACGAAGTTATGGTACCAAAAGGTAGGTTCAACCACTGATGCCTAGGCACACCGAAACGACTAACCCTAATTCTTATCCTTTACTTCAGGAACTTAAAAAAAAAAATCAAAATGGGCAACAAATGCTGC	Integrated DNA Technologies, Inc.San Diego, CA
Primer76	ACGATTCATAGGCCTTTACTTGTAAAGCTCGTCCATACCG	Integrated DNA Technologies, Inc.San Diego, CA
Primer77	TAC AAG TAA AGG CCT ATGAATCGTTTTTAAAATAACAAATCAATTG	Integrated DNA Technologies, Inc.San Diego, CA
Primer78	CCG CTC TAG AAC TAG TGTTAACTCGAATCGCTATCCAAGC	Integrated DNA Technologies, Inc.San Diego, CA
PrimerS472	AGTCAG ACCGGT GTTTAAAC AATCAACCTCTGGATTACAAAATTTGTGAAAG	Integrated DNA Technologies, Inc.San Diego, CA
PrimerS473	AGTCAG AAGCTTCAGGCGGGGAGGCGGCCC	Integrated DNA Technologies, Inc.San Diego, CA
Primer116	AATAGATCTGCGGCCGCAATCAAAATGGAGGCCAAG	Integrated DNA Technologies, Inc.San Diego, CA
Primer117	ACAAAGATCCTCTAGATTAATCTCCGTCCTCCAGC	Integrated DNA Technologies, Inc.San Diego, CA
PrimerS26	CACCTCACTTTGCACAACCAGGG	Integrated DNA Technologies, Inc.San Diego, CA
PrimerS27	CACGGAGTGAAAGTCCTACG	Integrated DNA Technologies, Inc.San Diego, CA
Primer_cas5-Sense	GCA GGC TCC GCG GCCgc GCTGCTCAAGGACCGCCC	Integrated DNA Technologies, Inc.San Diego, CA
Primer_cas5-Antisense	AGC TGG GTC GGC GCGcc TAGCATGAAACCATCCCATCAG	Integrated DNA Technologies, Inc.San Diego, CA
HJ046-pdm2-37a-F	AGTCAG GCGGCCGC TGAACTCCCGAGATTTCTCC	Integrated DNA Technologies, Inc.San Diego, CA
HJ047-pdm2-37a-R	AGTCAG ggcgcgcc AGCTTCAACTTCTTCGGTCG	Integrated DNA Technologies, Inc.San Diego, CA
HJ048-svp-29-F	AGTCAG GCGGCCGC aacatttaaccgcgaacggg	Integrated DNA Technologies, Inc.San Diego, CA
HJ049-svp-29-R	AGTCAG ggcgcgcc TGGTTTCGATAGAGTCCTCG	Integrated DNA Technologies, Inc.San Diego, CA
HJ050-danr-1-F	AGTCAG GCGGCCGC cggacaaagagtactcatgg	Integrated DNA Technologies, Inc.San Diego, CA
HJ051-danr-1-R	AGTCAG ggcgcgcc GATTGCGATTACGATAGCGG	Integrated DNA Technologies, Inc.San Diego, CA
tll-15-Sense	AGTCAGGCGGCCGCAAAGAACCTTTTCAGACACTATGCC	Integrated DNA Technologies, Inc.San Diego, CA
tll-15-Antisense	AGTCAG GGCGCGCCCAGTGGGAAGAATACTAACGAAC	Integrated DNA Technologies, Inc.San Diego, CA
gBlock_cas8	AGCAGGCTCCGAATTCGCCCTTcgcggatatattcagcacagcactgggatttctttttgaaaattctttaagatttcttcactatattcagcacagatcacagcacggatttcgaatttcggattttggatcgactttcttgcacggcgtctcgtctcaGCGATCcTCaAAGTTCGGCTGCGaggcTCAAACTGcTTCAACTCTTCCGCggcctCcgGCTAATATAGCAAAaATTgCGCAAATCcatgcccaagtgCAACCCTCTCgccaccggttCTCTTAAAAAACCGATCTcGCCGCTcTCGCTCTCTTAAAAAACGaatAAaatgagaagtccGTtggTGGTGGTggttcgaccttcatcccctagttttttaaccgacccttcgcaggaaaat…	Integrated DNA Technologies, Inc.San Diego, CA
gBlock_CG7229-5	AGCAGGCTCCGAATTCGCCCTTTCCTAAGAGCTTGGGAAATTGCGATCAGAGATTTAGCATCTCCAATCTCTACTGTCTTTGCAACGATCACGTAGACCAGCAAAATTTTCACGAAAAATTATGCAAATTTCCGAACTTTCTCACGATCGCAGCCAAAAAAGGATAACGATGCTCGCAGTACCTGACACCCAGCAGTCAAATTAGAGCGGAGATCACGCAGATCCTGTATCTCGCGGCGGAAGGAGTTTTTCACAGCCAAGGAAATTTGCATAAGATTTTCACTTGGCGAATATAAAGGGAAGGGCGAGGATGCACTCTCATTTGCATAAGGAAACTCGCATTGCGAAACTGCCAAAAGAACTCGGATGCAAACGAAAGTGAAAATGGGATGGAAAAAG…	Integrated DNA Technologies, Inc.San Diego, CA
DNE-Sense	CACCTCACTTTGCACAACCAGGG	Integrated DNA Technologies, Inc.San Diego, CA
DNE-Antiense	CACGGAGTGAAAGTCCTACG	Integrated DNA Technologies, Inc.San Diego, CA
Primer_EGFP-Kir2.1-Sense	AAC TCT GAA TAG ATC TAAAAGGTAGGTTCAACCACTGATGCCTAGGCACACCGAAACGACTAACCCTAATTCTTATCCTTTACTTCAGG AACTTAAAAAAAAAAATCAAA ATGGTGAGCAAGGGCGAGGA	Integrated DNA Technologies, Inc.San Diego, CA
Primer_EGFP-Kir2.1-XbaI-Antisense	ACA AAG ATC CTC TAG A TCATATCTCCGATTCTCGCC	Integrated DNA Technologies, Inc.San Diego, CA
Primer_dTrpA1-Sense	AAC TCT GAA TAG ATC TAA AAG GTA GGT TCA ACC ACT GAT GCC TAG GCA CAC CGA AAC GAC TAA CCC TAA TTC TTA TCC TTT ACT TCA GGC GGC CGC AAC TTA AAA AAA AAA ATC AAA ATG ACT TCG GGC GAC AAG GAG	Integrated DNA Technologies, Inc.San Diego, CA
Primer_dTrpA1-Antisense	ACAAAGATCC TCTAGA CTCGAG CTACATGCTCTTATTGAAGCTCAG	Integrated DNA Technologies, Inc.San Diego, CA
