# Supplementary figures and images for: Cre-assisted fine-mapping of neural circuits using orthogonal split inteins
Source: eLife journal article supplement (doi:10.7554/elife.53041), 2020-04-14

**Figure 1—figure supplement 1**

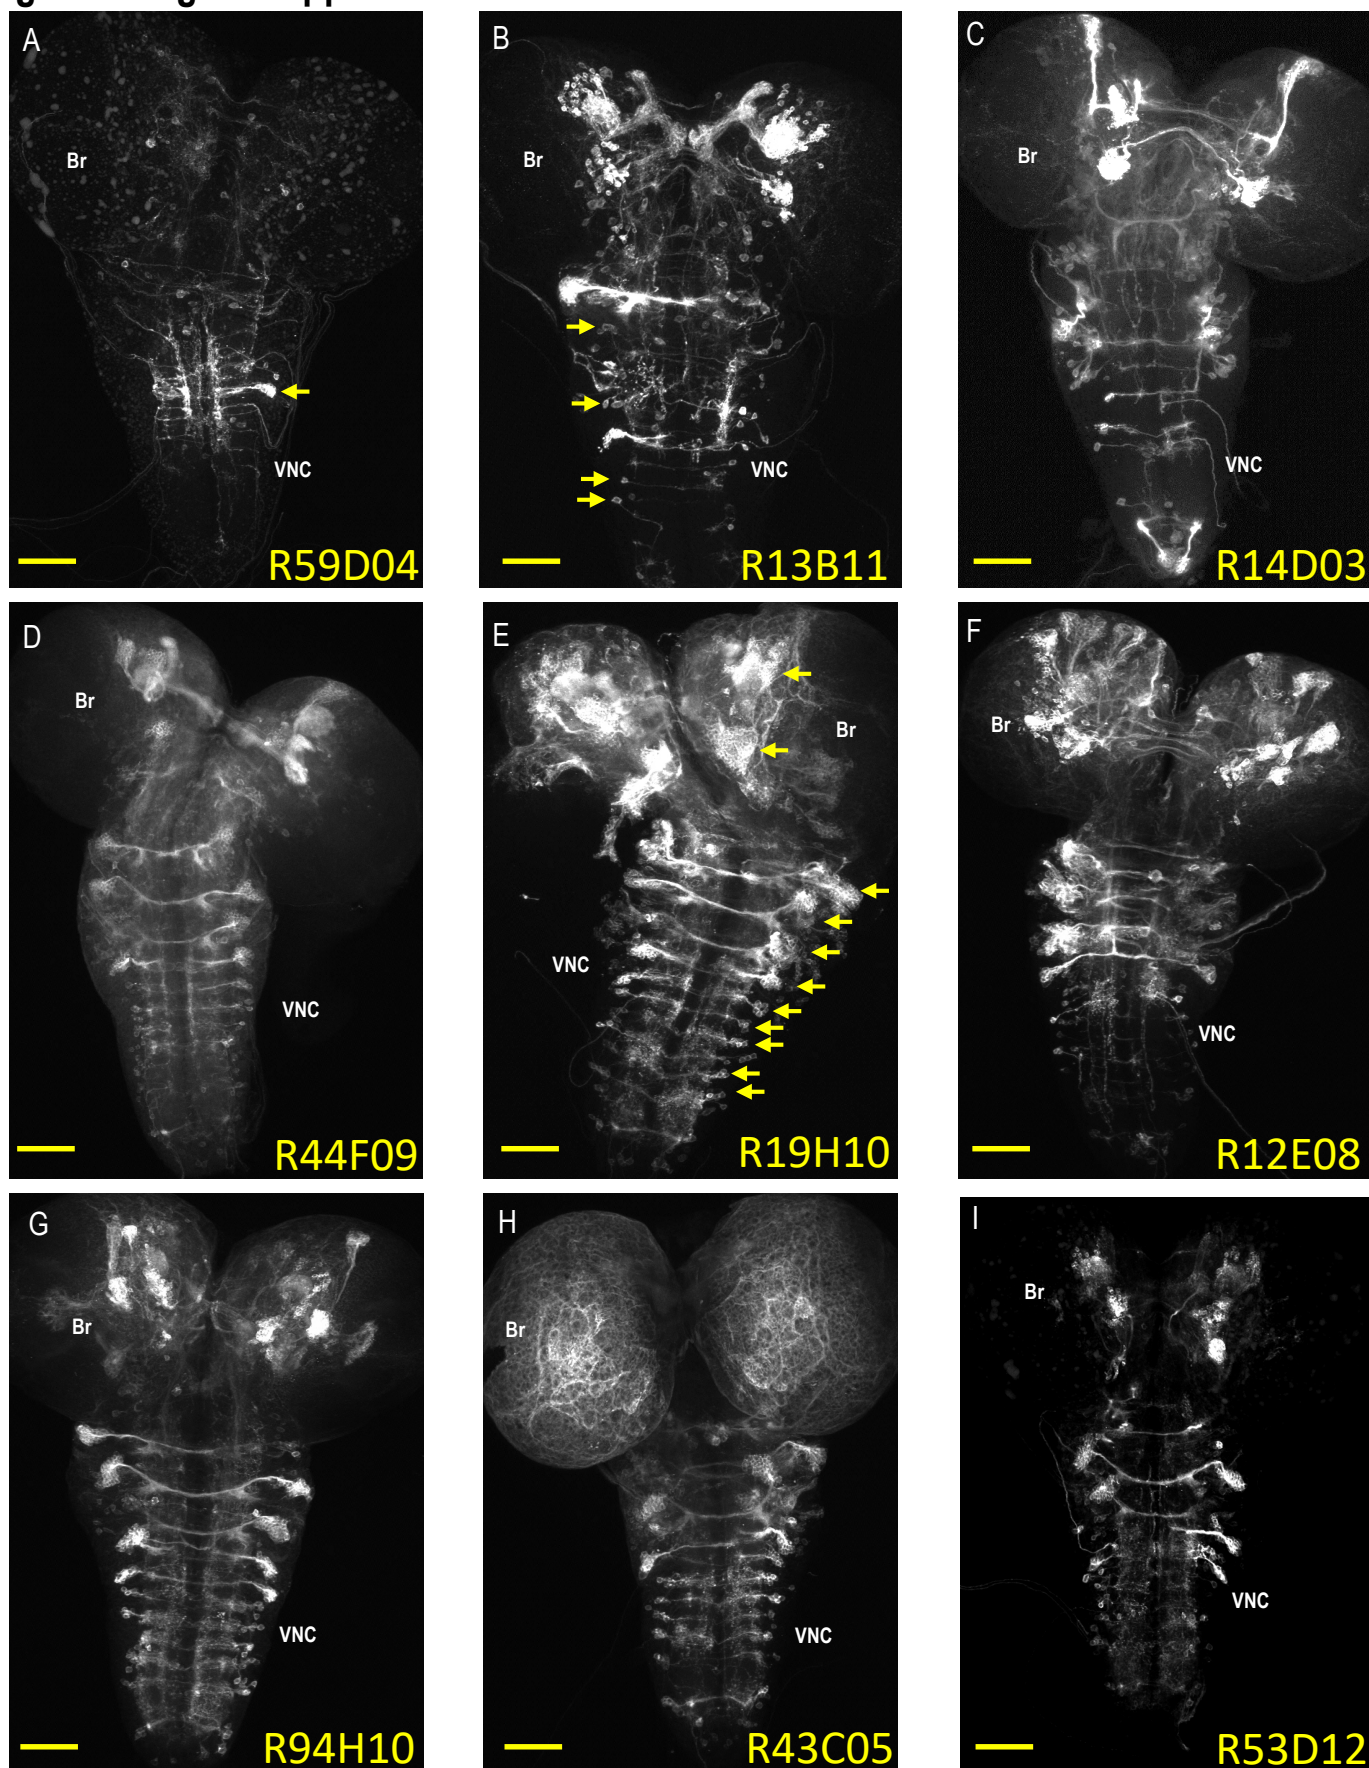

Supplement: supp [file elife_poa_e53041_Figure_1_figure_supplement_1.pdf › elife_poa_e53041_Figure_1_figure_supplement_1.pdf]

Figure 1—figure supplement 3

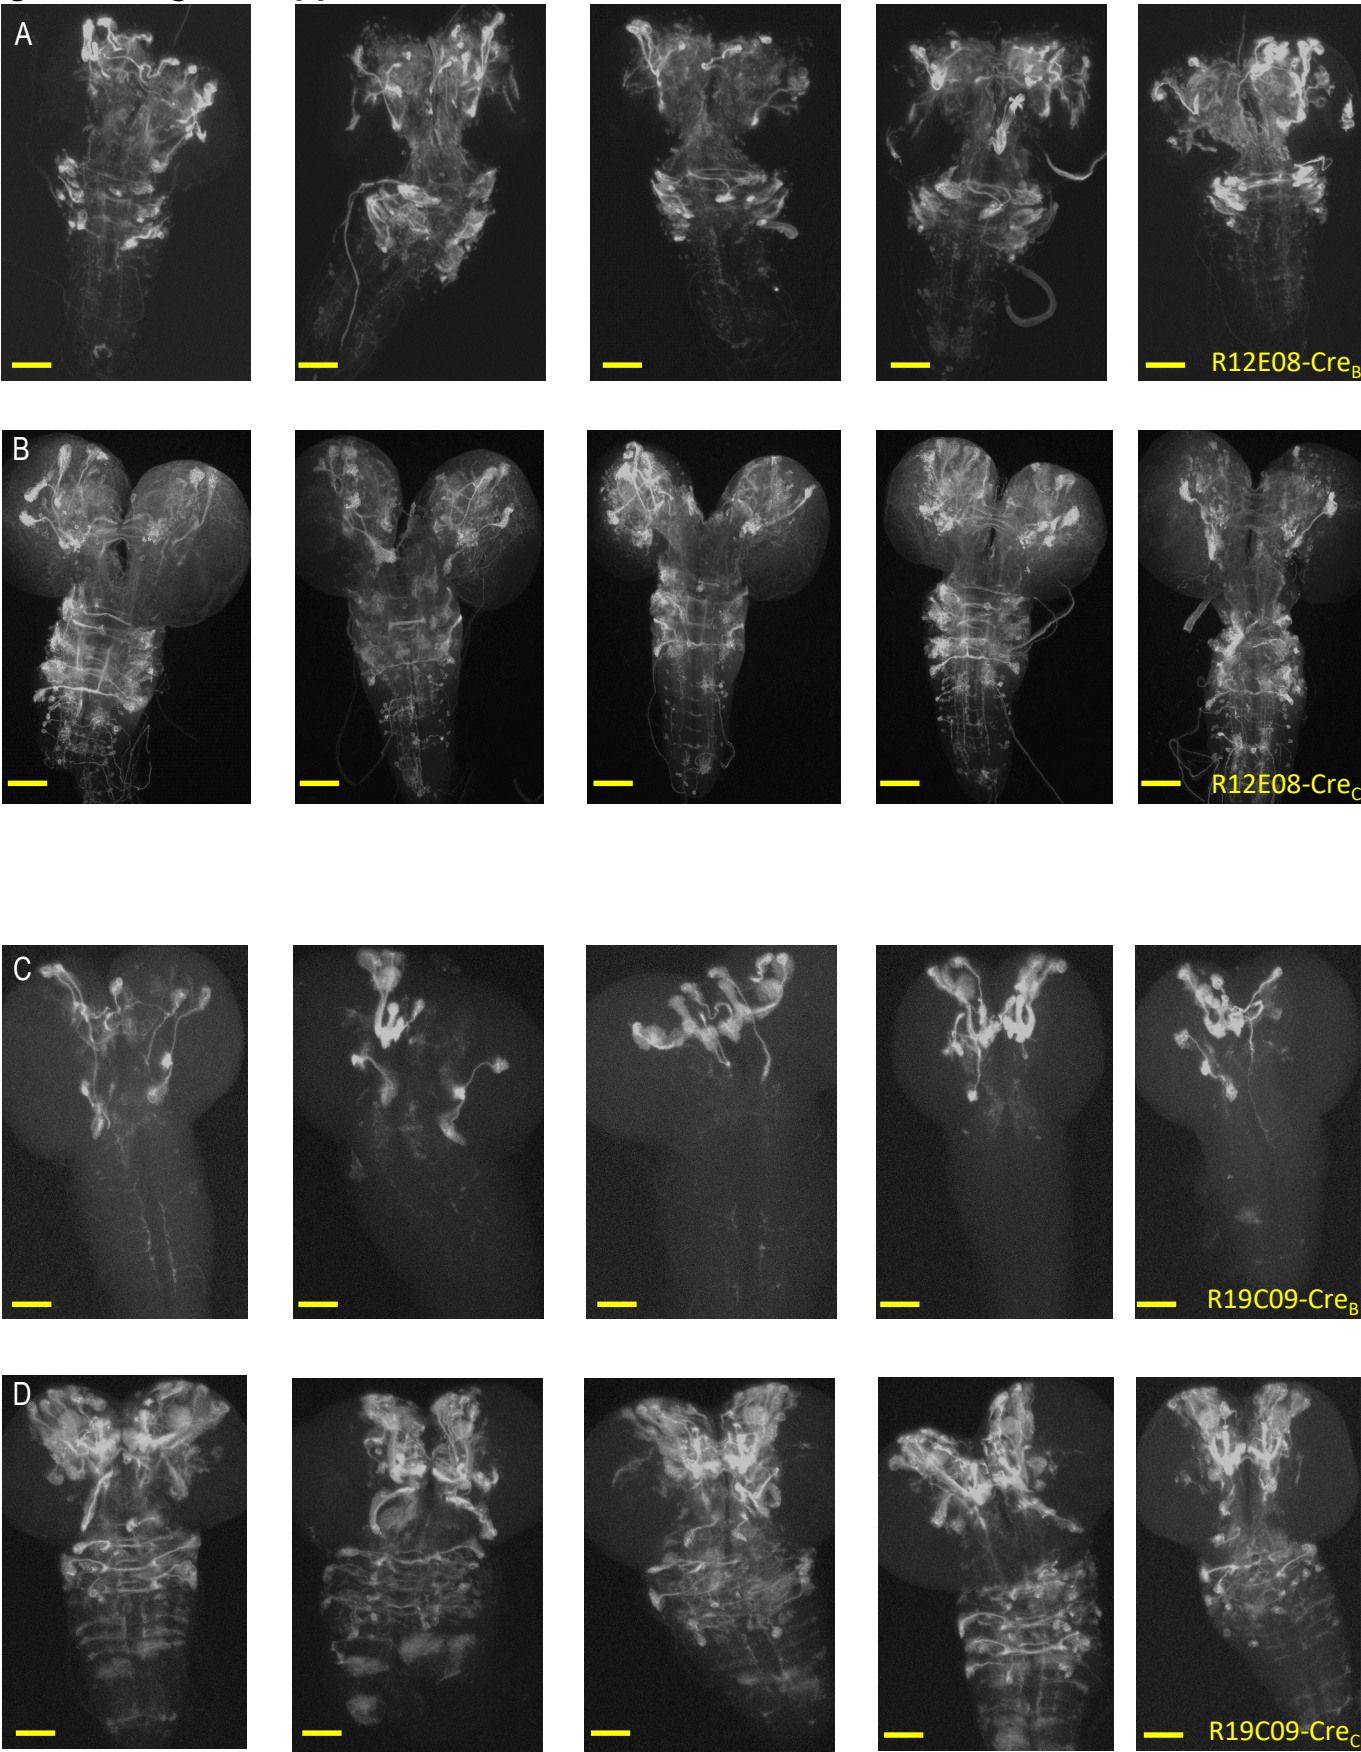

Supplement: supp [file elife_poa_e53041_Figure_1_figure_supplement_3.pdf › elife_poa_e53041_Figure_1_figure_supplement_3.pdf]

Figure 2—figure supplement 1

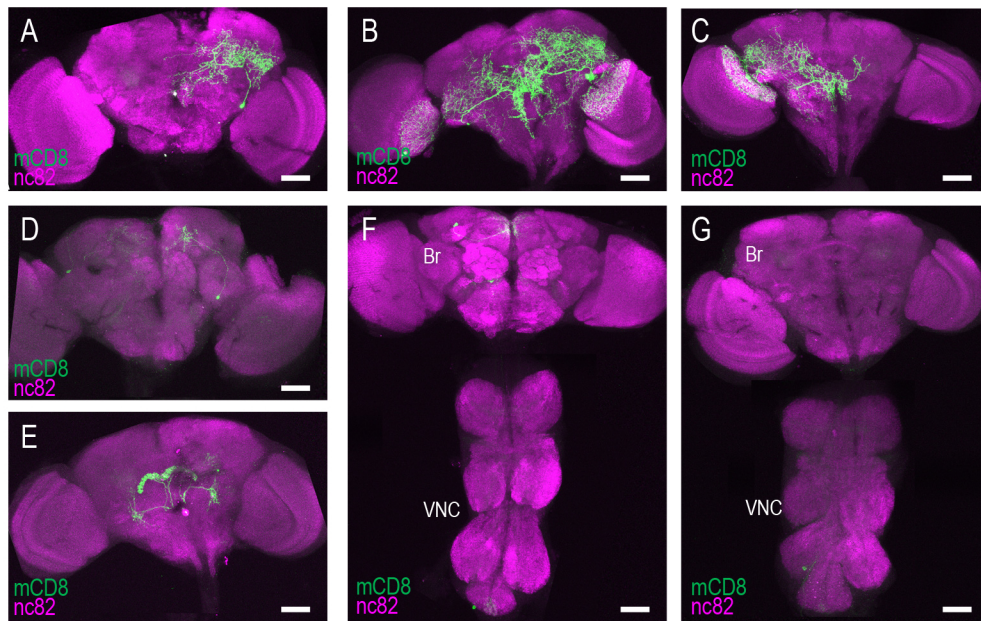

TH-Gal4<sup>R44F09-Cre<sub>B</sub></sup>∩R52B02-Cre<sub>C</sub>

Supplement: supp [file elife_poa_e53041_Figure_2_figure_supplement_1.pdf › elife_poa_e53041_Figure_2_figure_supplement_1.pdf]

**Figure 2—figure supplement 2**

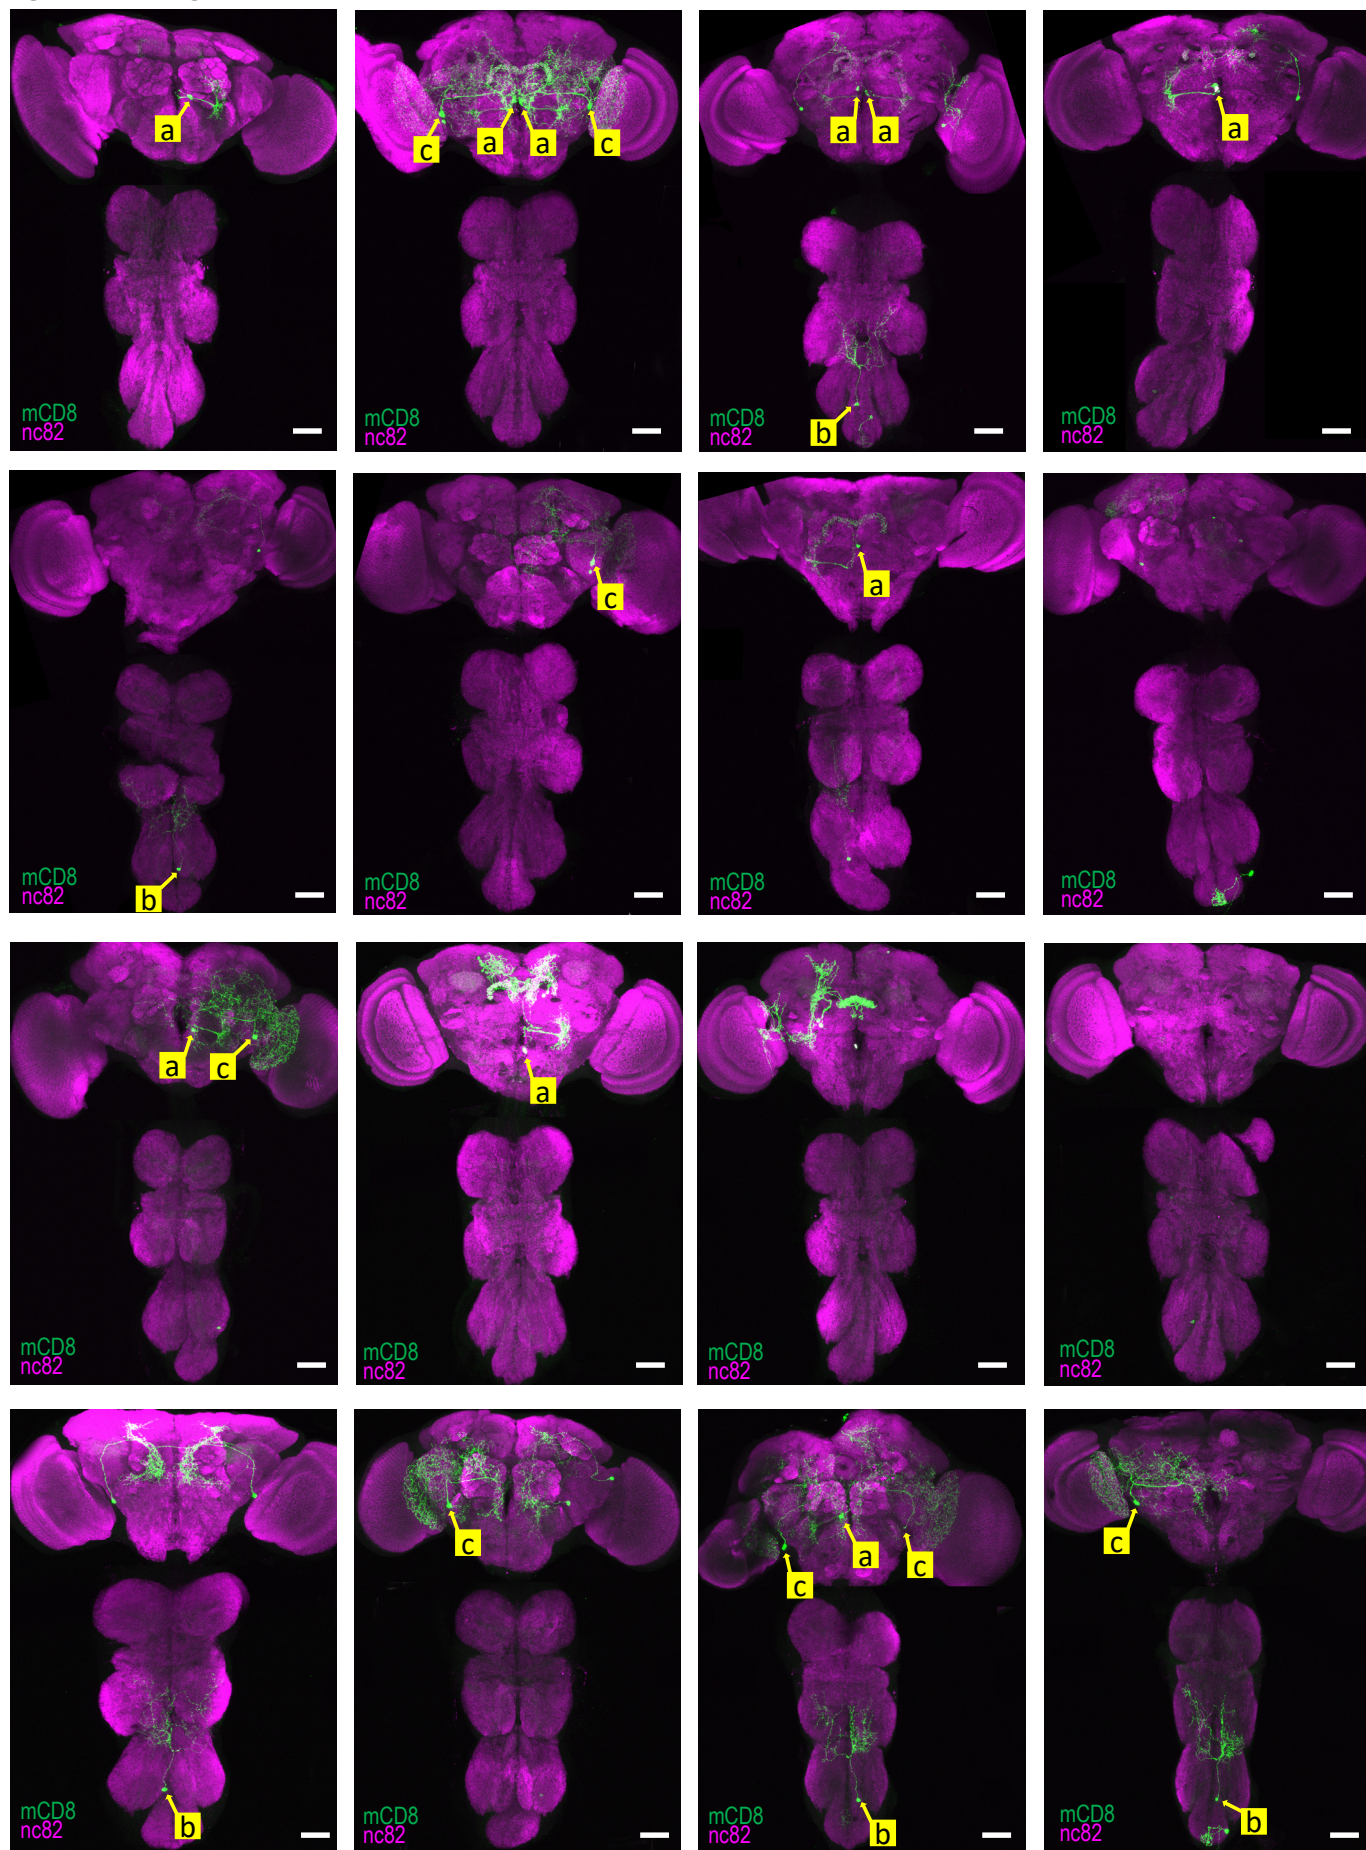

Supplement: supp [file elife_poa_e53041_Figure_2_figure_supplement_2.pdf › elife_poa_e53041_Figure_2_figure_supplement_2.pdf]

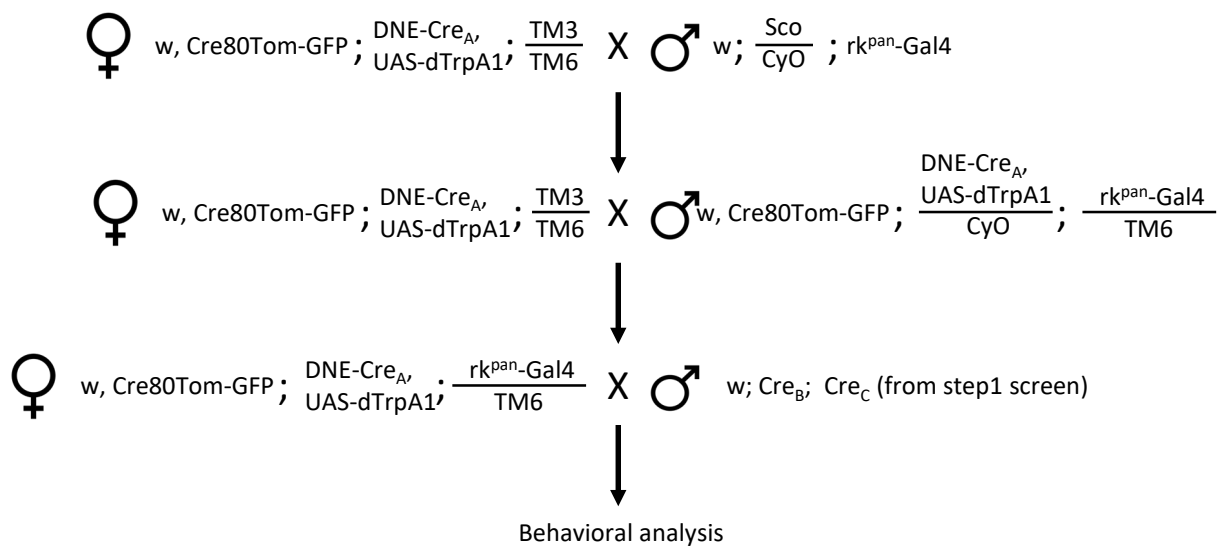

Supplement: supp [file elife_poa_e53041_Figure_3_figure_supplement_1.pdf › elife_poa_e53041_Figure_3_figure_supplement_1.pdf]

Figure 3—figure supplement 2

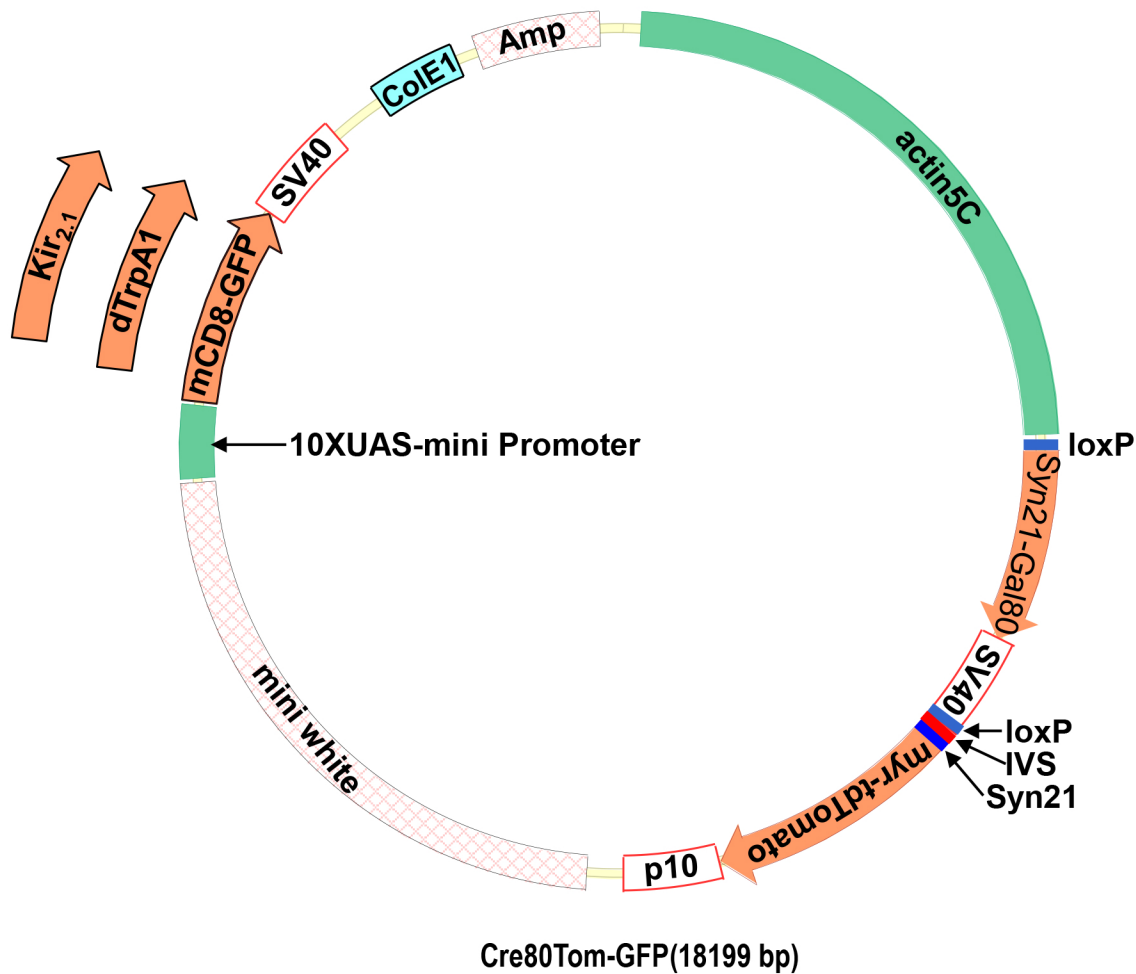

Supplement: supp [file elife_poa_e53041_Figure_3_figure_supplement_2.pdf › elife_poa_e53041_Figure_3_figure_supplement_2.pdf]

Figure 3—figure supplement 3

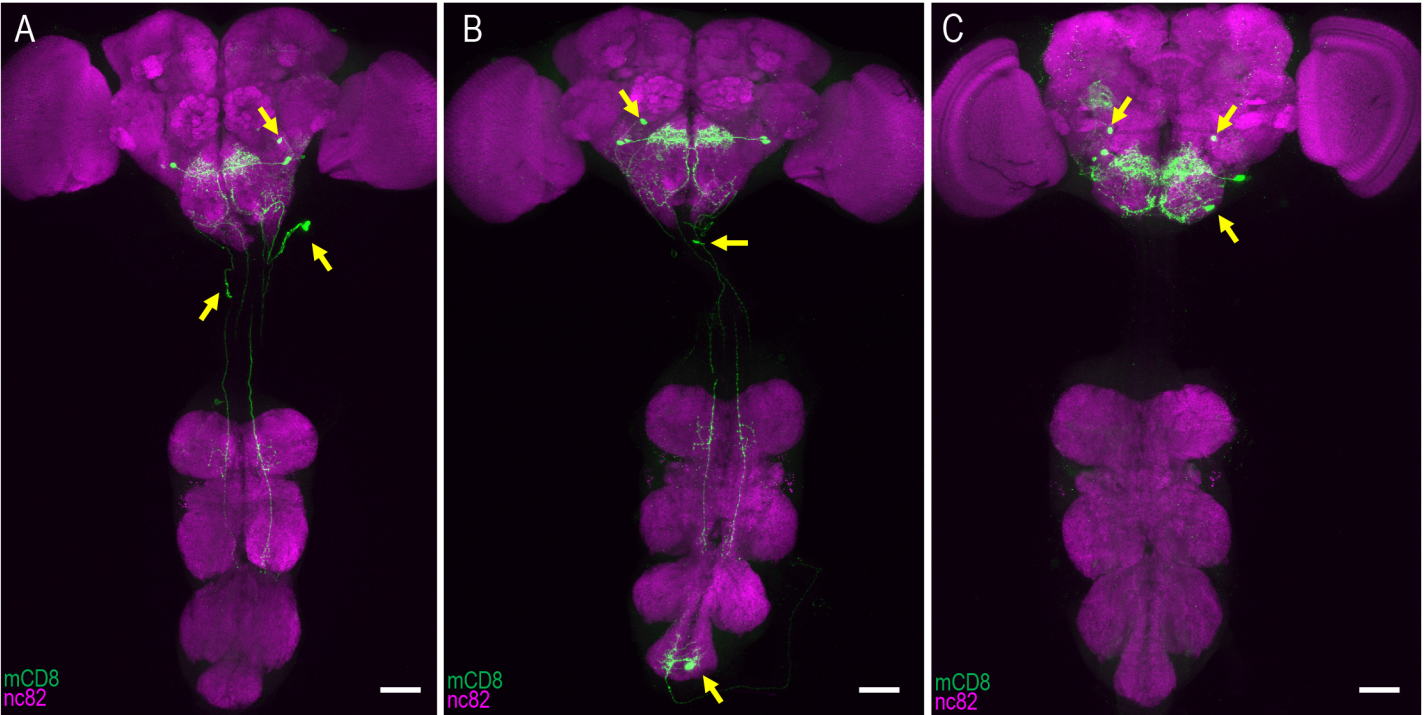

$rk^{pan\_Gal4}R16H11-Cre_B \cap R25G06-Cre_C$

Supplement: supp [file elife_poa_e53041_Figure_3_figure_supplement_3.pdf › elife_poa_e53041_Figure_3_figure_supplement_3.pdf]
